# Supplementary material
Source: publisher figshare collection journal article supplement (https://frontiersin.figshare.com/ndownloader/files/30662582)
Supplement: Supplementary file [file 30662582]

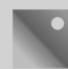**SERIES MOTORAS**

/3

"Mire atentamente lo que estoy haciendo". El examinador realiza tres veces la serie de Luria "puño, canto, palma". Ahora haga lo mismo con su mano derecha, primero conmigo y después solo." El examinador realiza las series 3 veces con el paciente y luego le dice. "Ahora, hágalo usted solo". **Puntuación:** 6 series consecutivas solo: 3 / al menos 3 series consecutivas solo: 2 / El paciente falla en 1 pero logra 3 series consecutivas con el examinador: 1 / El paciente no logra 3 series consecutivas con el examinador : 0

**INSTRUCCIONES CONFLICTIVAS**

/3

"Golpee dos veces cuando yo golpee una vez". Para asegurarse que el paciente comprendió bien la consigna, realice una serie de 3 pruebas: 1-1-1. "Golpee una vez cuando yo golpee dos veces". Para asegurarse que el paciente comprendió bien la consigna, realice una serie de 3 pruebas: 2-2-2. El examinador realiza la siguiente serie: 1-1-2-1-2-2-2-1-1-2. **Puntuación:** Sin error: 3 / Uno o dos errores: 2 / Mas de dos errores: 1 / El paciente golpea como el examinador al menos 4 veces consecutivas : 0

**CONTROL INHIBITORIO MOTOR**

/3

"Golpee una vez cuando yo golpee una vez". Para asegurarse que el paciente comprendió bien la consigna, realice una serie de 3 pruebas: 1-1-1. "No golpee cuando yo golpee dos veces". Para asegurarse que el paciente comprendió bien la consigna, realice una serie de 3 pruebas: 2-2-2. El examinador realiza la siguiente serie: 1-1-2-1-2-2-2-1-1-2. **Puntuación:** Sin error: 3 / Uno o dos errores: 2 / Mas de dos errores: 1 / El paciente golpea como el examinador al menos 4 veces consecutivas : 0

**REPETICIÓN DE DÍGITOS ATRÁS**

/6

|                 |  |                 |  |
|-----------------|--|-----------------|--|
| 2-4             |  | 5-7             |  |
| 6-2-9           |  | 4-1-5           |  |
| 3-2-7-9         |  | 4-9-6-8         |  |
| 1-5-2-8-6       |  | 6-1-8-4-3       |  |
| 5-3-9-4-1-8     |  | 7-2-4-8-5-6     |  |
| 8-1-2-9-3-6-5   |  | 4-7-3-9-1-2-8   |  |
| 9-4-3-7-6-2-5-8 |  | 7-2-8-1-9-6-5-3 |  |

**MESES ATRÁS**

/2

|           |  |           |  |         |  |            |  |         |  |       |  |
|-----------|--|-----------|--|---------|--|------------|--|---------|--|-------|--|
| Diciembre |  | Noviembre |  | Octubre |  | Septiembre |  | Agosto  |  | Julio |  |
| Junio     |  | Mayo      |  | Abril   |  | Marzo      |  | Febrero |  | Enero |  |

**MEMORIA DE TRABAJO VISUAL**

/4

|       |  |           |  |
|-------|--|-----------|--|
| 1-2   |  | 3-4-2-1   |  |
| 2-4-3 |  | 1-4-2-3-4 |  |

Señale los cubos en el orden indicado, el paciente deberá copiar esta secuencia de movimientos en orden inverso. Hágalo despacio; el paciente decide que mano prefiere utilizar.

**REFRANES**

/3

|                                             |                                                                       |  |
|---------------------------------------------|-----------------------------------------------------------------------|--|
| <b>Perro que ladra, no muerde</b>           | Los que hablan mucho, suelen hacer poco.                              |  |
| <b>A mal tiempo, buena cara</b>             | Tomar una actitud positiva frente a las adversidades                  |  |
| <b>En casa de herrero, cuchillo de palo</b> | Carecer de algo cuando por tu profesión u oficio, no debiera faltarte |  |

Ejemplo: ½ punto. Explicación Correcta: 1 Punto.

**CONTROL INHIBITORIO VERBAL**

6

**Iniciación**

Me pongo los zapatos y me ato los .....

Peleaban como perro y .....

**Inhibición**

Juan compró caramelos en el .....

Ojo por ojo y diente por .....

Lave la ropa con agua y .....

Iniciación: Escuche cuidadosamente esta oración y cuando yo haya terminado de leerla, usted debe decirme lo más rápido posible, qué palabra podría completar la frase. Consignar respuesta. Inhibición. Diferente: 2/ Rel. Semántica: 1/Palabra exacta: 0 punto. Esta vez quiero que me diga una palabra que no tenga ningún sentido en el contexto de la oración, que no tenga ninguna relación con la misma. Por ejemplo: Daniel golpeó el clavo con el ...lluvia.

**Puntaje Total** =

**Índice de Memoria de Trabajo (Digitos atrás + corsi)** =
